# Supplementary material for: Developing a fall prevention intervention economic model
Source: PubMed Central journal article supplement (PMC9882648; doi:10.1371/journal.pone.0280572), 2023-01-27
Supplement: pone.0280572.s001.pdf [file pone.0280572.s001.pdf]

**Database: Ovid MEDLINE: Epub Ahead of Print, In-Process & Other Non-Indexed Citations, Ovid MEDLINE® Daily and Ovid MEDLINE® <1946-Present>**

Search Strategy:

- 
- 1 Accidental Falls/pc [Prevention & Control] (8267)
  - 2 ((fall or falls or falling) adj3 prevent\*).tw,kf. (6564)
  - 3 ((fall or falls or falling) adj3 reduc\*).tw,kf. (3054)
  - 4 ((fall or falls or falling) adj3 decreas\*).tw,kf. (1133)
  - 5 ((fall or falls or falling) adj3 protect\*).tw,kf. (407)
  - 6 ((slip or slips or slipping) adj3 prevent\*).tw,kf. (250)
  - 7 or/1-6 (14380)
  - 8 Economics/ (27028)
  - 9 exp "costs and cost analysis"/ (224438)
  - 10 Economics, Dental/ (1902)
  - 11 exp economics, hospital/ (23546)
  - 12 Economics, Medical/ (9010)
  - 13 Economics, Nursing/ (3986)
  - 14 Economics, Pharmaceutical/ (2857)
  - 15 (economic\$ or cost or costs or costly or costing or price or prices or pricing or pharmaco-economic\$.ti,ab. (719539)
  - 16 (expenditure\$ not energy).ti,ab. (27357)
  - 17 value for money.ti,ab. (1549)
  - 18 budget\$.ti,ab. (27186)
  - 19 or/8-18 (866184)
  - 20 ((energy or oxygen) adj cost).ti,ab. (3868)
  - 21 (metabolic adj cost).ti,ab. (1312)
  - 22 ((energy or oxygen) adj expenditure).ti,ab. (23451)
  - 23 or/20-22 (27691)
  - 24 19 not 23 (859813)
  - 25 letter.pt. (1026559)
  - 26 editorial.pt. (490082)
  - 27 historical article.pt. (351477)
  - 28 exp animals/ not humans/ (4578616)
  - 29 25 or 26 or 27 or 28 (6373984)
  - 30 24 not 29 [NHS EED MEDLINE Search Filter  
<http://www.crd.york.ac.uk/crdweb/searchstrategies.asp#nhseedmedline> ] (773349)
  - 31 7 and 30 (1267)
  - 32 limit 7 to "economics (best balance of sensitivity and specificity)" (1149)
  - 33 limit 7 to "costs (best balance of sensitivity and specificity)" (801)
  - 34 31 or 32 or 33 (1303)
  - 35 limit 34 to ("all child (0 to 18 years)" or "young adult (19 to 24 years)") (117)

- 36 limit 35 to "all aged (65 and over)" (59)
- 37 35 not 36 (58)
- 38 34 not 37 (1245)
- 39 limit 38 to (comment or editorial or historical article or letter) (15)
- 40 38 not 39 (1230)
- 41 limit 40 to (english or thai) (1164)
- 42 remove duplicates from 41 (1159)

**Database: Embase Classic+Embase <1947 to 2019 May 10>**

Search Strategy:

- 
- 1 falling/pc [Prevention] (2928)
  - 2 ((fall or falls or falling) adj3 prevent\*).tw. (8694)
  - 3 ((fall or falls or falling) adj3 reduc\*).tw. (4263)
  - 4 ((fall or falls or falling) adj3 decreas\*).tw. (1813)
  - 5 ((fall or falls or falling) adj3 protect\*).tw. (507)
  - 6 ((slip or slips or slipping) adj3 prevent\*).tw. (362)
  - 7 fall risk/ and (prevent\* or reduc\* or decreas\*).tw. (2053)
  - 8 1 or 2 or 3 or 4 or 5 or 6 or 7 (16227)
  - 9 Health Economics/ (36670)
  - 10 exp Economic Evaluation/ (288256)
  - 11 exp Health Care Cost/ (276603)
  - 12 pharmacoeconomics/ (7007)
  - 13 9 or 10 or 11 or 12 (513022)
  - 14 (econom\$ or cost or costs or costly or costing or price or prices or pricing or pharmacoeconomic\$).ti,ab. (983203)
  - 15 (expenditure\$ not energy).ti,ab. (37870)
  - 16 (value adj2 money).ti,ab. (2272)
  - 17 budget\$.ti,ab. (36170)
  - 18 14 or 15 or 16 or 17 (1017870)
  - 19 13 or 18 (1238170)
  - 20 letter.pt. (1063587)
  - 21 editorial.pt. (600043)
  - 22 note.pt. (751094)
  - 23 20 or 21 or 22 (2414724)
  - 24 19 not 23 (1141175)
  - 25 (metabolic adj cost).ti,ab. (1454)
  - 26 ((energy or oxygen) adj cost).ti,ab. (4341)
  - 27 ((energy or oxygen) adj expenditure).ti,ab. (30311)
  - 28 25 or 26 or 27 (35015)
  - 29 24 not 28 (1133862)

- 30 animal/ (1904951)
- 31 exp animal experiment/ (2380598)
- 32 nonhuman/ (5786898)
- 33 (rat or rats or mouse or mice or hamster or hamsters or animal or animals or dog or dogs or cat or cats or bovine or sheep).ti,ab,sh. (6310479)
- 34 30 or 31 or 32 or 33 (9276766)
- 35 exp human/ (20954171)
- 36 human experiment/ (451315)
- 37 35 or 36 (20955766)
- 38 34 not (34 and 37) (6952058)
- 39 29 not 38 [NHS EED Ovid EMBASE Economics Search Filter  
<http://www.crd.york.ac.uk/crdweb/searchstrategies.asp>] (1032560)
- 40 8 and 39 (1581)
- 41 limit 40 to child <unspecified age> (51)
- 42 limit 41 to aged <65+ years> (25)
- 43 41 not 42 (26)
- 44 40 not 43 (1555)
- 45 limit 44 to embase (683)
- 46 limit 45 to (english or thai) (639)
- 47 remove duplicates from 46 (627)

**Database: EBM Reviews - NHS Economic Evaluation Database <1st Quarter 2016>**

Search Strategy:

- 
- 1 Accidental Falls/pc [Prevention & Control] (34)
  - 2 ((fall or falls or falling) adj3 prevent\*).tw. (35)
  - 3 ((fall or falls or falling) adj3 reduc\*).tw. (17)
  - 4 ((fall or falls or falling) adj3 decreas\*).tw. (1)
  - 5 ((fall or falls or falling) adj3 protect\*).tw. (1)
  - 6 ((slip or slips or slipping) adj3 prevent\*).tw. (0)
  - 7 1 or 2 or 3 or 4 or 5 or 6 (45)
  - 8 limit 7 to "all child (0 to 18 years)" (1)
  - 9 limit 8 to "all adult (19 plus years)" (0)
  - 10 8 not 9 (1)
  - 11 7 not 10 (44)

**Database: EBM Reviews - Cochrane Central Register of Controlled Trials <April 2019>, EBM Reviews - Cochrane Database of Systematic Reviews <2005 to May 2, 2019>, EBM Reviews - Database of Abstracts of Reviews of Effects <1st Quarter 2016>, EBM Reviews - Cochrane Methodology Register <3rd Quarter 2012>, EBM Reviews - Health Technology Assessment <4th Quarter 2016>**

Search Strategy:

- 
- 1 Accidental Falls/pc [Prevention & Control] (4)
  - 2 ((fall or falls or falling) adj3 prevent\*).tw. (1805)
  - 3 ((fall or falls or falling) adj3 reduc\*).tw. (1765)
  - 4 ((fall or falls or falling) adj3 decreas\*).tw. (502)
  - 5 ((fall or falls or falling) adj3 protect\*).tw. (95)
  - 6 ((slip or slips or slipping) adj3 prevent\*).tw. (27)
  - 7 1 or 2 or 3 or 4 or 5 or 6 (3338)
  - 8 Economics/ (54)
  - 9 exp "costs and cost analysis"/ (11012)
  - 10 Economics, Dental/ or exp economics, hospital/ or Economics, Medical/ or Economics, Nursing/ or Economics, Pharmaceutical/ (792)
  - 11 (economic\$ or cost or costs or costly or costing or price or prices or pricing or pharmaco-economic\$.ti,ab. (69235)
  - 12 (expenditure\$ not energy).ti,ab. (1640)
  - 13 value for money.ti,ab. (226)
  - 14 budget\$.ti,ab. (989)
  - 15 8 or 9 or 10 or 11 or 12 or 13 or 14 (72039)
  - 16 7 and 15 (412)
  - 17 remove duplicates from 16 (397)

### AgeLine

| #   | Query                                                                                    | Limiters/Expanders                                                                               | Results |
|-----|------------------------------------------------------------------------------------------|--------------------------------------------------------------------------------------------------|---------|
| S15 | S13 NOT S14                                                                              | Search modes - Boolean/Phrase                                                                    | 225     |
| S14 | S13                                                                                      | Limiters - Publication Type: Book, Chapter, Dissertation, Video<br>Search modes - Boolean/Phrase | 21      |
| S13 | S4 OR S12                                                                                | Search modes - Boolean/Phrase                                                                    | 246     |
| S12 | S10 AND S11                                                                              | Search modes - Boolean/Phrase                                                                    | 216     |
| S11 | economic* or cost or costs or costly or costing or price or prices or pricing or budget* | Search modes - Boolean/Phrase                                                                    | 29,716  |

|     |                                                                                                                                                                           |                               |       |
|-----|---------------------------------------------------------------------------------------------------------------------------------------------------------------------------|-------------------------------|-------|
| S10 | S5 OR S6 OR S7 OR S8 OR S9                                                                                                                                                | Search modes - Boolean/Phrase | 1,530 |
| S9  | ((slip or slips or slipping) N3 prevent*)                                                                                                                                 | Search modes - Boolean/Phrase | 9     |
| S8  | ((fall or falls or falling) N3 protect*)                                                                                                                                  | Search modes - Boolean/Phrase | 61    |
| S7  | ((fall or falls or falling) N3 decreas*)                                                                                                                                  | Search modes - Boolean/Phrase | 160   |
| S6  | ((fall or falls or falling) N3 reduc*)                                                                                                                                    | Search modes - Boolean/Phrase | 593   |
| S5  | (fall or falls or falling) N3 prevent*                                                                                                                                    | Search modes - Boolean/Phrase | 1,090 |
| S4  | S1 AND S2 AND S3                                                                                                                                                          | Search modes - Boolean/Phrase | 36    |
| S3  | DE "Prevention" OR DE "Accident Prevention"                                                                                                                               | Search modes - Boolean/Phrase | 1,702 |
| S2  | ((DE "Cost Effectiveness" OR DE "Costs") AND (DE "Institutional Costs" OR DE "Hospital Costs" OR DE "Health Service Costs" OR DE "Drug Costs")) OR (DE "Quality of Life") | Search modes - Boolean/Phrase | 6,514 |
| S1  | DE "Falls"                                                                                                                                                                | Search modes - Boolean/Phrase | 2,642 |
