# Supplementary material for: Developing a fall prevention intervention economic model
Source: PubMed Central journal article supplement (PMC9882648; doi:10.1371/journal.pone.0280572), 2023-01-27
Supplement: pone.0280572.s002.pdf [file pone.0280572.s002.pdf]

## Literature search on October 23, 2019 in Medline

|                                                                                                                      |        |
|----------------------------------------------------------------------------------------------------------------------|--------|
| 1 ((fall or falls or falling) adj3 prevent*).tw,kf                                                                   | 6796   |
| 2 ((fall or falls or falling) adj3 reduc*).tw,kf.                                                                    | 3159   |
| 3 ((fall or falls or falling) adj3 decreas*).tw,kf.                                                                  | 1162   |
| 4 ((fall or falls or falling) adj3 protect*).tw,kf.                                                                  | 414    |
| 5 ((slip or slips or slipping) adj3 prevent*).tw,kf.                                                                 | 254    |
| 6 Accidental Falls/pc [Prevention & Control]                                                                         | 8541   |
| 7 1 or 2 or 3 or 4 or 5 or 6                                                                                         | 14837  |
| 8 exp clinical pathway/                                                                                              | 6435   |
| 9 exp clinical protocol/                                                                                             | 162275 |
| 10exp consensus/                                                                                                     | 11453  |
| 11exp consensus development conference/                                                                              | 11637  |
| 12exp consensus development conferences as topic/                                                                    | 2761   |
| 13critical pathways/                                                                                                 | 6435   |
| 14exp guideline/                                                                                                     | 32796  |
| 15guidelines as topic/                                                                                               | 38654  |
| 16exp practice guideline/                                                                                            | 25940  |
| 17practice guidelines as topic/                                                                                      | 112924 |
| 18health planning guidelines/                                                                                        | 4060   |
| 19(guideline or practice guideline or consensus development conference or consensus development conference, NIH).pt. | 41914  |
| 20(position statement* or policy statement* or practice parameter* or best practice*).ti,ab,kf,kw.                   | 30586  |
| 21(standards or guideline or guidelines).ti,kf,kw.                                                                   | 104535 |
| 22((practice or treatment* or clinical) adj guideline*).ab.                                                          | 37432  |
| 23(CPG or CPGs).ti.                                                                                                  | 5544   |

October 23, 2019

|                                                                                                                                                              |        |
|--------------------------------------------------------------------------------------------------------------------------------------------------------------|--------|
| 24consensus*.ti,kf,kw.                                                                                                                                       | 24400  |
| 25consensus*.ab. /freq=2                                                                                                                                     | 23647  |
| 26((critical or clinical or practice) adj2 (path or paths or pathway or pathways or protocol*)).ti,ab,kf,kw.                                                 | 19035  |
| 27recommendat*.ti,kf,kw.                                                                                                                                     | 38684  |
| 28(care adj2 (standard or path or paths or pathway or pathways or map or maps or plan or plans)).ti,ab,kf,kw.                                                | 54408  |
| 29(algorithm* adj2 (screening or examination or test or tested or testing or assessment* or diagnosis or diagnoses or diagnosed or diagnosing)).ti,ab,kf,kw. | 7095   |
| 30(algorithm* adj2 (pharmacotherap* or chemotherap* or chemotreatment* or therap* or treatment* or intervention*)).ti,ab,kf,kw.                              | 9201   |
| 314 or 8 or 9 or 10 or 11 or 12 or 13 or 14 or 15 or 16 or 17 or 18 or 19 or 20 or 21 or 22 or 23 or 24 or 25 or 26 or 27 or 28 or 29 or 30                  | 586362 |
| 327 and 31                                                                                                                                                   | 1238   |
| 33limit 32 to "all aged (65 and over)"                                                                                                                       | 596    |
| 34limit 33 to english language                                                                                                                               | 543    |
| 35limit 34 to (female or humans or male)                                                                                                                     | 543    |
| 36(Randomized Controlled Trial or Controlled Clinical Trial or Pragmatic Clinical Trial or Equivalence Trial or Clinical Trial, Phase III).pt.               | 584187 |
| 37Randomized Controlled Trial/                                                                                                                               | 492634 |
| 38exp Randomized Controlled Trials as Topic/                                                                                                                 | 130993 |
| 39"Randomized Controlled Trial (topic)"/                                                                                                                     | 0      |
| 40Controlled Clinical Trial/                                                                                                                                 | 93388  |
| 41exp Controlled Clinical Trials as Topic/                                                                                                                   | 136126 |
| 42"Controlled Clinical Trial (topic)"/                                                                                                                       | 0      |
| 43Randomization/                                                                                                                                             | 100879 |
| 44Random Allocation/                                                                                                                                         | 100879 |
| 45Double-Blind Method/                                                                                                                                       | 154184 |
| 46Double Blind Procedure/                                                                                                                                    | 0      |

|                                                                                                                                                                                          |         |
|------------------------------------------------------------------------------------------------------------------------------------------------------------------------------------------|---------|
| 47Double-Blind Studies/                                                                                                                                                                  | 154184  |
| 48Single-Blind Method/                                                                                                                                                                   | 27496   |
| 49Single Blind Procedure/                                                                                                                                                                | 0       |
| 50Single-Blind Studies/                                                                                                                                                                  | 27496   |
| 51Placebos/                                                                                                                                                                              | 34564   |
| 52Placebo/                                                                                                                                                                               | 0       |
| 53Control Groups/                                                                                                                                                                        | 1635    |
| 54Control Group/                                                                                                                                                                         | 1635    |
| 55(random* or sham or placebo*).ti,ab,hw,kf,kw.                                                                                                                                          | 1433449 |
| 56((singl* or doubl*) adj (blind* or dumm* or mask*)).ti,ab,hw,kf,kw.                                                                                                                    | 229241  |
| 57((tripl* or trebl*) adj (blind* or dumm* or mask*)).ti,ab,hw,kf,kw.                                                                                                                    | 915     |
| 58(control* adj3 (study or studies or trial* or group*)).ti,ab,kf,kw.                                                                                                                    | 935141  |
| 59(Nonrandom* or non random* or non-random* or quasi-random* or quasirandom*).ti,ab,hw,kf,kw.                                                                                            | 41981   |
| 60allocated.ti,ab,hw.                                                                                                                                                                    | 62140   |
| 61((open label or open-label) adj5 (study or studies or trial*)).ti,ab,hw,kf,kw.                                                                                                         | 32676   |
| 62((equivalence or superiority or non-inferiority or noninferiority) adj3 (study or studies or trial*)).ti,ab,hw,kf,kw.                                                                  | 7497    |
| 63(pragmatic study or pragmatic studies).ti,ab,hw,kf,kw.                                                                                                                                 | 369     |
| 64((pragmatic or practical) adj3 trial*).ti,ab,hw,kf,kw.                                                                                                                                 | 4466    |
| 65((quasiexperimental or quasi-experimental) adj3 (study or studies or trial*)).ti,ab,hw,kf,kw.                                                                                          | 7003    |
| 66(phase adj3 (III or "3") adj3 (study or studies or trial*)).ti,hw,kf,kw.                                                                                                               | 26539   |
| 6736 or 37 or 38 or 39 or 40 or 41 or 42 or 43 or 44 or 45 or 46 or 47 or 48 or 49 or 50 or 51 or 52 or 53 or 54 or 55 or 56 or 57 or 58 or 59 or 60 or 61 or 62 or 63 or 64 or 65 or 66 | 2063477 |
| 6835 not 67                                                                                                                                                                              | 399     |
